# Supplementary material for: Secondary pulmonary alveolar proteinosis complicating myelodysplastic syndrome results in worsening of prognosis: a retrospective cohort study in Japan
Source: PubMed Central journal article supplement (PMC3946190; doi:10.1186/1471-2466-14-37), 2014-03-05

**< Additional Figure-2 >**

*Survival curves in each MDS groups classified by WHO-criteria*

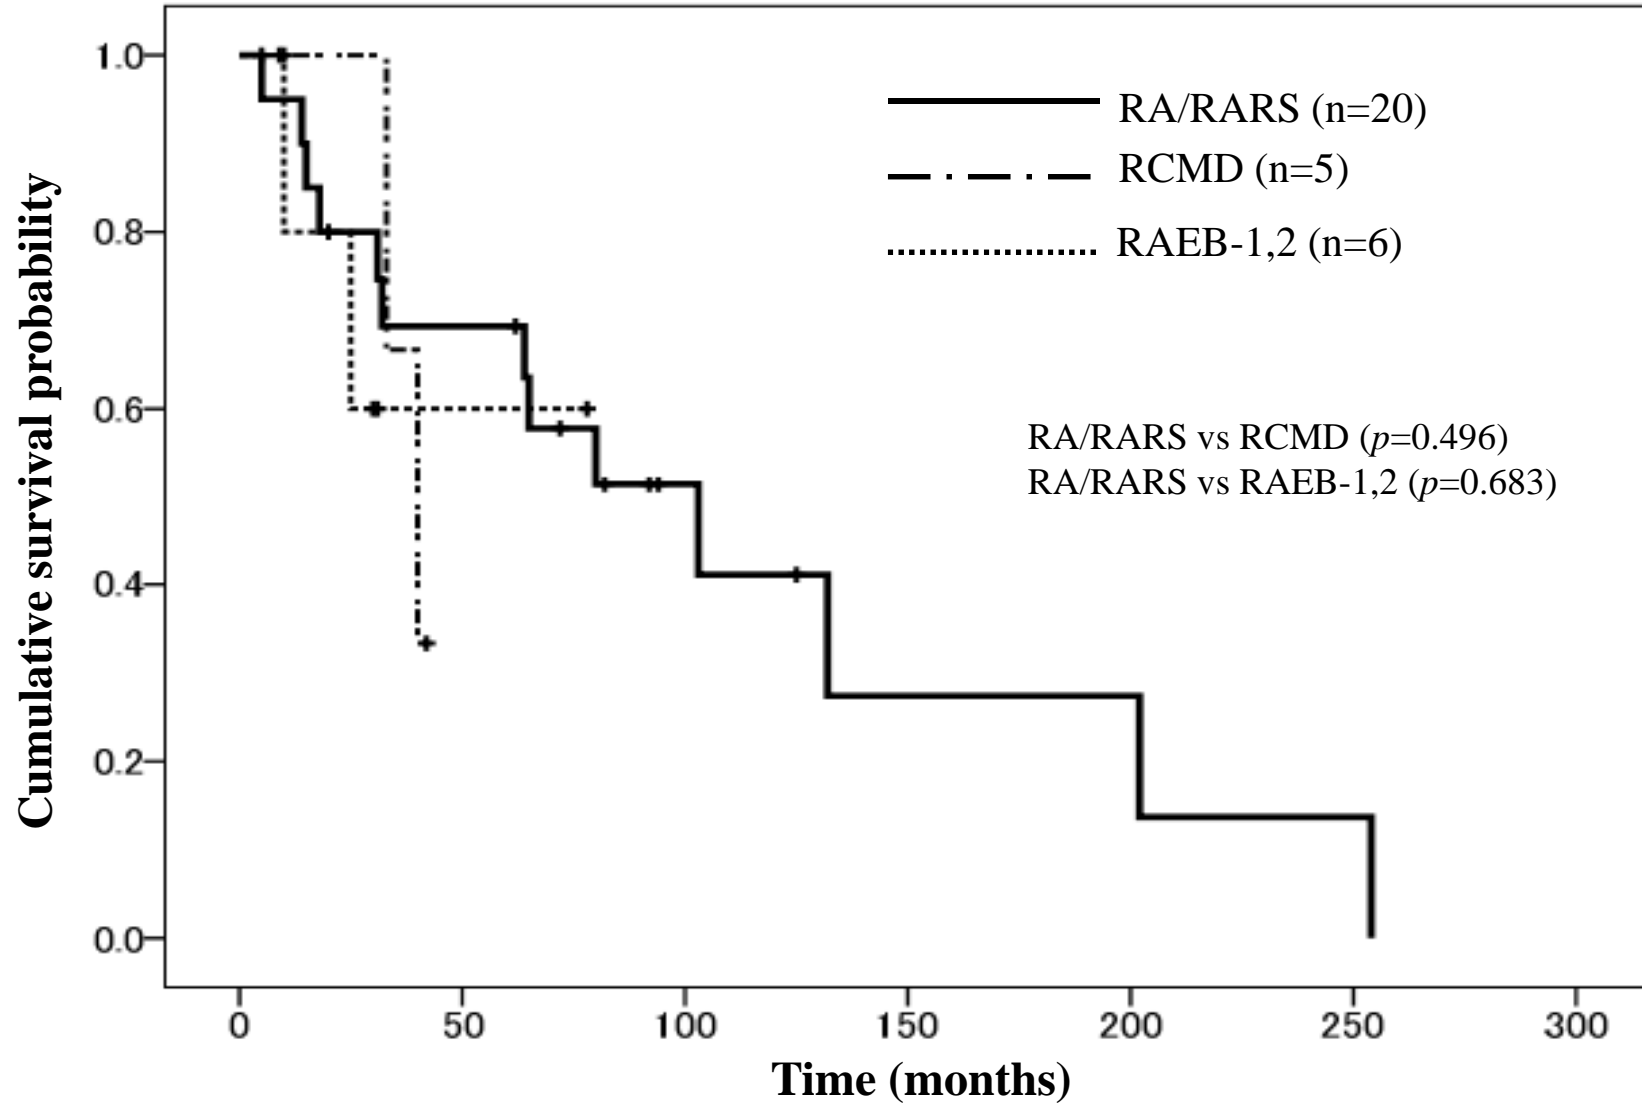

Supplement: 1471-2466-14-37-S2.pdf [file 1471-2466-14-37-S2.pdf]
